# Supplementary material
Source: PubMed Central journal article supplement (PMC9838615)
Supplement: NIHMS1779024-supplement-2020_JCGS_VAR_SEL_SUPP.pdf [file NIHMS1779024-supplement-2020_JCGS_VAR_SEL_SUPP.pdf]

**Supplementary materials for *Variable  
selection with multiply-imputed datasets:  
choosing between stacked and grouped  
methods***

Jiacong Du<sup>1</sup>, Jonathan Boss<sup>1</sup>, Peisong Han<sup>1</sup>, Lauren J Beesley<sup>1</sup>, Michael Kleinsasser<sup>1</sup>  
Stephen A Goutman<sup>2</sup>, Stuart Batterman<sup>3</sup>, Eva L Feldman<sup>2</sup>, Bhramar Mukherjee<sup>1</sup>

<sup>1</sup>Department of Biostatistics, University of Michigan, Ann Arbor, MI

<sup>2</sup>Department of Neurology, University of Michigan, Ann Arbor, MI

<sup>3</sup>Department of Environmental Health Science, University of Michigan, Ann Arbor, MI

Corresponding author Jiacong Du [jiacong@umich.edu](mailto:jiacong@umich.edu)

January 3, 2022

Table S1: Summary of methods for handling missing data and variable selection in the literature.

| Class                                                                          | Method                                                                   | Key reference<br>First author, year | Method description                                                                                                                                                                                                                                                                                                                               | Limitations                                                                                                                                                                                                                                           |
|--------------------------------------------------------------------------------|--------------------------------------------------------------------------|-------------------------------------|--------------------------------------------------------------------------------------------------------------------------------------------------------------------------------------------------------------------------------------------------------------------------------------------------------------------------------------------------|-------------------------------------------------------------------------------------------------------------------------------------------------------------------------------------------------------------------------------------------------------|
| Sequential handling missing data by multiple imputation and variable selection | Ad-hoc thresholding                                                      | Wood et al. (2008)                  | First apply the existing variable selection method, e.g., stepwise selection, on each imputed dataset. A variable is considered selected if it is selected in at least $\pi D$ imputed datasets, $0 < \pi \leq 1$ .                                                                                                                              | No clear guideline on how to choose the thresholding parameter $\pi$ .                                                                                                                                                                                |
|                                                                                | Bootstrapped imputation and variable selection                           | Long and Johnson (2015)             | This method imputes missing values in the bootstrapped samples from the original data and applies penalized regression on each bootstrapped imputed dataset. Proportions of each covariate selected over all bootstrap imputed datasets are provided and the final active set is determined by a thresholding.                                   | 1. Coefficient estimates can only be obtained after the final active set is determined.<br>2. Still requires ad-hoc thresholding.                                                                                                                     |
|                                                                                | Elastic net regularization on the stacked imputed datasets               | Wan et al. (2015)                   | Simultaneously performs variable selection and regression coefficient estimation by maximizing the data likelihood after stacking all imputed datasets subject to elastic net penalization. Each data point is weighted by an observational weight which quantifies the proportion of observed covariates out of the total number of covariates. | 1. Only continuous outcomes are considered in the paper.<br>2. Using the proposed observational weights can introduce bias if the missing data mechanism is dependent on the outcome.                                                                 |
|                                                                                | Group LASSO regularization on the pooled likelihood for imputed datasets | Chen and Wang (2013)                | Group LASSO penalized optimization over all imputed datasets, where the groups are defined by regression coefficients corresponding to the same variable across all imputed datasets. Variable selection and point estimation are obtained simultaneously.                                                                                       | 1. Existing optimization algorithm uses local quadratic approximation, which is reliant on a subjective hard thresholding rule to select variables.<br>2. The existing implementation is limited to continuous outcomes and a LASSO penalty function. |
| Simultaneously handling missing data and variable selection                    | Bayesian variable selection by data augmentation strategy                | Yang et al. (2005)                  | The Simultaneously Impute and Select method jointly models the missing data mechanism, model parameters, and selection indicators in a Bayesian framework, and samples joint posterior draws using Gibbs sampler.                                                                                                                                | Can be computationally intensive for a large amount of missingness.                                                                                                                                                                                   |
|                                                                                | Penalized maximum likelihood estimators combined with EM algorithm       | Garcia et al. (2010)                | Variable selection and coefficient estimates are simultaneously obtained by maximizing the penalized observed data likelihood. SCAD and ALASSO penalty functions have been studied. Additional information criteria involving penalized observed data likelihood have been developed for choosing tuning parameters.                             | Computational challenges for integrating the augmented likelihood with no closed forms over the missing data distribution to find the observed data likelihood.                                                                                       |
|                                                                                | Penalized estimating equations combined with IPW/AIPW                    | Johnson et al. (2008)               | Missing data is handled by IPW for each complete-observed data point, and variable selection is achieved by solving the penalized estimating equations.                                                                                                                                                                                          | Assumes that the missing data pattern is monotone.                                                                                                                                                                                                    |

Table S2: Missing data proportion for 30 variables in the ALS data. The data in total contains 266 observations with 167 cases and 99 controls.

| <b>Variables</b> | <b>Proportion</b> | <b>Variables</b> | <b>Proportion</b> |
|------------------|-------------------|------------------|-------------------|
| PCB 174          | 0.508             | PCB 153          | 0.237             |
| PCB 110          | 0.429             | PCB 202          | 0.199             |
| cis-chlordane    | 0.398             | cis-nonachlor    | 0.147             |
| trans-nonachlor  | 0.380             | beta-HCH         | 0.132             |
| PCB 175          | 0.368             | PBDE 99          | 0.086             |
| trans-chlordane  | 0.365             | p,p'-DDE         | 0.083             |
| PCB 118          | 0.361             | PeCB             | 0.060             |
| PCB 180          | 0.350             | PBDE 100         | 0.056             |
| PBDE 28          | 0.305             | Education1       | 0.038             |
| PCB 138          | 0.278             | Education2       | 0.038             |
| PBDE 154         | 0.267             | PCB 151          | 0.034             |
| PBDE 153         | 0.256             | PBDE 47          | 0.015             |
| BMI              | 0.244             | Age              | 0.011             |
| BMI_slope        | 0.244             | Sex              | 0.000             |
| PBDE 85          | 0.241             | ALS              | 0.000             |

### Pearson correlation plot of 23 environmental pollutants

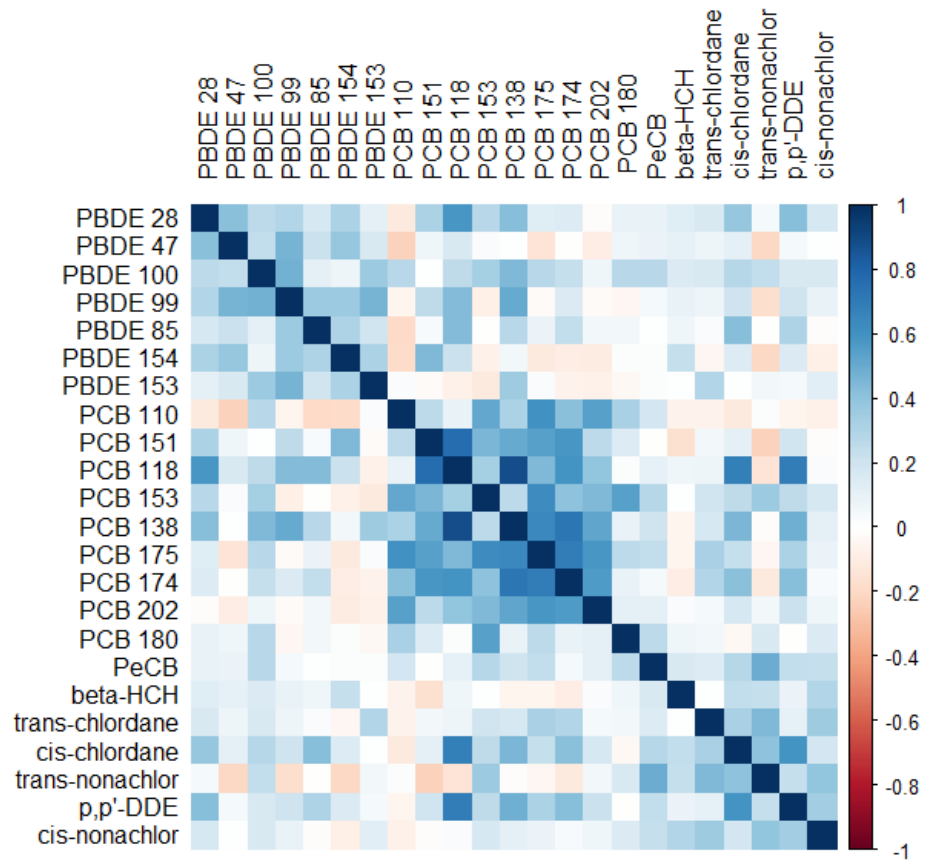

Figure S1: Pairwise Pearson correlation matrix for 23 POPs collected through the University of Michigan ALS Patient Biorepository. The dataset contains 266 observations (167 cases and 99 controls).

Table S3: Regression coefficient estimates for five POPs collected as part of the University of Michigan ALS Patients Biorepository case-control study (167 ALS cases and 99 healthy controls). Results are based on 10 imputed datasets. Only five of the 23 POPs are displayed because the other 18 POPs were not selected by any method.

| POPs                | SLASSO    | SaLASSO   | SENET     | SaENET    | SLASSO<br>(w) | SaLASSO<br>(w) | SENET<br>(w) | SaENET<br>(w) | GLASSO    | GaLASSO   |
|---------------------|-----------|-----------|-----------|-----------|---------------|----------------|--------------|---------------|-----------|-----------|
| PBDE 153            | 0.087     | -         | 0.095     | -         | 0.090         | 0.075          | 0.099        | 0.067         | 0.081     | -         |
| PeCB                | 0.316     | 0.751     | 0.354     | 0.743     | 0.268         | 0.645          | 0.307        | 0.655         | 0.295     | 0.969     |
| trans-<br>chlordane | 0.067     | 0.001     | 0.104     | 0.003     | 0.068         | 0.081          | 0.105        | 0.068         | 0.047     | -         |
| cis-<br>nonachlor   | 0.220     | 0.578     | 0.278     | 0.572     | 0.225         | 0.524          | 0.284        | 0.530         | 0.185     | 0.194     |
| PCB151              | 0.060     | 0.173     | 0.109     | 0.171     | 0.035         | -              | 0.090        | -             | 0.031     | -         |
| <b># selected</b>   | <b>5</b>  | <b>4</b>  | <b>5</b>  | <b>4</b>  | <b>5</b>      | <b>4</b>       | <b>5</b>     | <b>4</b>      | <b>5</b>  | <b>2</b>  |
| <b># removed</b>    | <b>18</b> | <b>19</b> | <b>18</b> | <b>19</b> | <b>18</b>     | <b>19</b>      | <b>18</b>    | <b>19</b>     | <b>18</b> | <b>21</b> |

Table S4: Sensitivity (SENS), specificity (SPEC), MSE for non-null coefficients ( $MSE_{non-null}$ ), and MSE for null coefficients ( $MSE_{null}$ ) for simulation Cases 1-4 with 50 imputed datasets. Cases 1 and 2 have 500 observations with 20 covariates, while Cases 3 and 4 have 1000 observations with 100 covariates. Cases 1 and 3 correspond to concentrated signals and Cases 2 and 4 correspond to distributed signals.

|                  | SLASSO | SaLASSO | SENET | SaENET | SLASSO<br>(w) | SaLASSO<br>(w) | SENET<br>(w) | SaENET<br>(w) | GLASSO | GaLASSO |
|------------------|--------|---------|-------|--------|---------------|----------------|--------------|---------------|--------|---------|
| Case 1           |        |         |       |        |               |                |              |               |        |         |
| <i>SENS</i>      | 1.00   | 1.00    | 1.00  | 1.00   | 1.00          | 0.99           | 1.00         | 0.99          | 0.98   | 0.94    |
| <i>SPEC</i>      | 0.53   | 0.93    | 0.53  | 0.92   | 0.55          | 0.93           | 0.54         | 0.93          | 0.49   | 0.98    |
| $MSE_{non-null}$ | 1.51   | 0.86    | 1.50  | 0.84   | 1.58          | 0.86           | 1.57         | 0.83          | 2.26   | 1.51    |
| $MSE_{null}$     | 0.20   | 0.12    | 0.20  | 0.12   | 0.22          | 0.12           | 0.22         | 0.13          | 0.14   | 0.06    |
| Case 2           |        |         |       |        |               |                |              |               |        |         |
| <i>SENS</i>      | 0.98   | 0.92    | 0.98  | 0.92   | 0.98          | 0.91           | 0.98         | 0.92          | 0.95   | 0.80    |
| <i>SPEC</i>      | 0.57   | 0.94    | 0.56  | 0.93   | 0.59          | 0.94           | 0.58         | 0.94          | 0.56   | 0.98    |
| $MSE_{non-null}$ | 1.75   | 1.47    | 1.74  | 1.44   | 1.81          | 1.53           | 1.79         | 1.46          | 2.66   | 2.43    |
| $MSE_{null}$     | 0.18   | 0.12    | 0.18  | 0.13   | 0.19          | 0.12           | 0.20         | 0.13          | 0.12   | 0.08    |
| Case 3           |        |         |       |        |               |                |              |               |        |         |
| <i>SENS</i>      | 1.00   | 0.98    | 1.00  | 0.98   | 1.00          | 0.98           | 1.00         | 0.98          | 0.98   | 0.77    |
| <i>SPEC</i>      | 0.34   | 0.73    | 0.34  | 0.72   | 0.43          | 0.80           | 0.42         | 0.79          | 0.10   | 0.86    |
| $MSE_{non-null}$ | 1.04   | 0.52    | 1.03  | 0.55   | 1.21          | 0.51           | 1.19         | 0.55          | 3.30   | 2.02    |
| $MSE_{null}$     | 1.08   | 1.47    | 1.11  | 1.44   | 0.87          | 1.23           | 0.91         | 1.18          | 29.70  | 1.09    |
| Case 4           |        |         |       |        |               |                |              |               |        |         |
| <i>SENS</i>      | 0.95   | 0.90    | 0.95  | 0.90   | 0.95          | 0.89           | 0.95         | 0.90          | 0.94   | 0.77    |
| <i>SPEC</i>      | 0.39   | 0.75    | 0.38  | 0.75   | 0.48          | 0.81           | 0.47         | 0.81          | 0.17   | 0.95    |
| $MSE_{non-null}$ | 1.21   | 0.93    | 1.19  | 0.90   | 1.31          | 0.97           | 1.29         | 0.93          | 2.28   | 2.46    |
| $MSE_{null}$     | 0.95   | 1.31    | 0.99  | 1.25   | 0.78          | 1.16           | 0.82         | 1.08          | 6.75   | 0.39    |

Table S5: Sensitivity (SENS), specificity (SPEC), MSE for non-null coefficients ( $MSE_{non-null}$ ), and MSE for null coefficients ( $MSE_{null}$ ) for simulation Cases 1-4 with 50 imputed datasets. Cases 1 and 2 have 500 observations with 20 covariates, while Cases 3 and 4 have 1000 observations with 100 covariates. Cases 1 and 3 correspond to concentrated signals and Cases 2 and 4 correspond to distributed signals. For each measure, SLASSO is used as the benchmark and the ratio to SLASSO is presented.

|                  | SLASSO | SaLASSO | SENET | SaENET | SLASSO<br>(w) | SaLASSO<br>(w) | SENET<br>(w) | SaENET<br>(w) | GLASSO | GaLASSO |
|------------------|--------|---------|-------|--------|---------------|----------------|--------------|---------------|--------|---------|
| Case 1           |        |         |       |        |               |                |              |               |        |         |
| <i>SENS</i>      | 1.00   | 1.00    | 1.00  | 1.00   | 1.00          | 0.99           | 1.00         | 0.99          | 0.98   | 0.94    |
| <i>SPEC</i>      | 1.00   | 1.74    | 0.99  | 1.74   | 1.02          | 1.75           | 1.02         | 1.74          | 0.91   | 1.83    |
| $MSE_{non-null}$ | 1.00   | 0.57    | 0.99  | 0.56   | 1.05          | 0.57           | 1.04         | 0.55          | 1.50   | 1.00    |
| $MSE_{null}$     | 1.00   | 0.58    | 1.01  | 0.61   | 1.10          | 0.60           | 1.11         | 0.66          | 0.70   | 0.32    |
| Case 2           |        |         |       |        |               |                |              |               |        |         |
| <i>SENS</i>      | 1.00   | 0.93    | 1.00  | 0.93   | 1.00          | 0.92           | 1.00         | 0.93          | 0.96   | 0.82    |
| <i>SPEC</i>      | 1.00   | 1.65    | 0.99  | 1.64   | 1.03          | 1.66           | 1.02         | 1.65          | 0.99   | 1.72    |
| $MSE_{non-null}$ | 1.00   | 0.84    | 0.99  | 0.82   | 1.04          | 0.87           | 1.02         | 0.83          | 1.52   | 1.39    |
| $MSE_{null}$     | 1.00   | 0.69    | 1.02  | 0.71   | 1.06          | 0.67           | 1.08         | 0.74          | 0.66   | 0.45    |
| Case 3           |        |         |       |        |               |                |              |               |        |         |
| <i>SENS</i>      | 1.00   | 0.99    | 1.00  | 0.99   | 1.00          | 0.98           | 1.00         | 0.98          | 0.98   | 0.77    |
| <i>SPEC</i>      | 1.00   | 2.14    | 0.99  | 2.12   | 1.26          | 2.33           | 1.24         | 2.32          | 0.30   | 2.51    |
| $MSE_{non-null}$ | 1.00   | 0.50    | 0.99  | 0.53   | 1.16          | 0.48           | 1.14         | 0.52          | 3.16   | 1.94    |
| $MSE_{null}$     | 1.00   | 1.36    | 1.02  | 1.33   | 0.81          | 1.13           | 0.84         | 1.09          | 27.42  | 1.01    |
| Case 4           |        |         |       |        |               |                |              |               |        |         |
| <i>SENS</i>      | 1.00   | 0.95    | 1.00  | 0.96   | 1.00          | 0.94           | 1.00         | 0.95          | 1.00   | 0.81    |
| <i>SPEC</i>      | 1.00   | 1.95    | 0.98  | 1.95   | 1.24          | 2.11           | 1.21         | 2.11          | 0.43   | 2.46    |
| $MSE_{non-null}$ | 1.00   | 0.77    | 0.99  | 0.74   | 1.08          | 0.80           | 1.06         | 0.77          | 1.89   | 2.03    |
| $MSE_{null}$     | 1.00   | 1.38    | 1.04  | 1.32   | 0.82          | 1.22           | 0.87         | 1.13          | 7.11   | 0.42    |

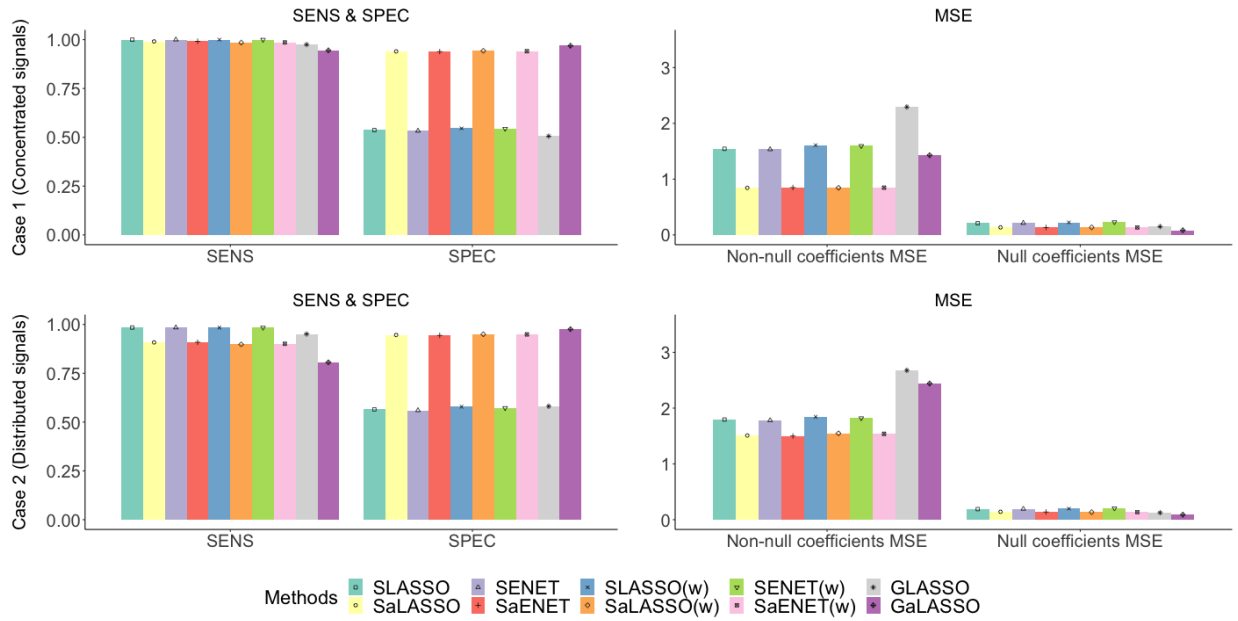

Figure S2: Simulation results for Case 1 (top panel) and Case 2 (bottom panel) where  $n=500$  and  $p=20$  for 10 imputed datasets. Sensitivity (SENS) and specificity (SPEC) are on the left and MSE for non-null and null coefficients are on the right.



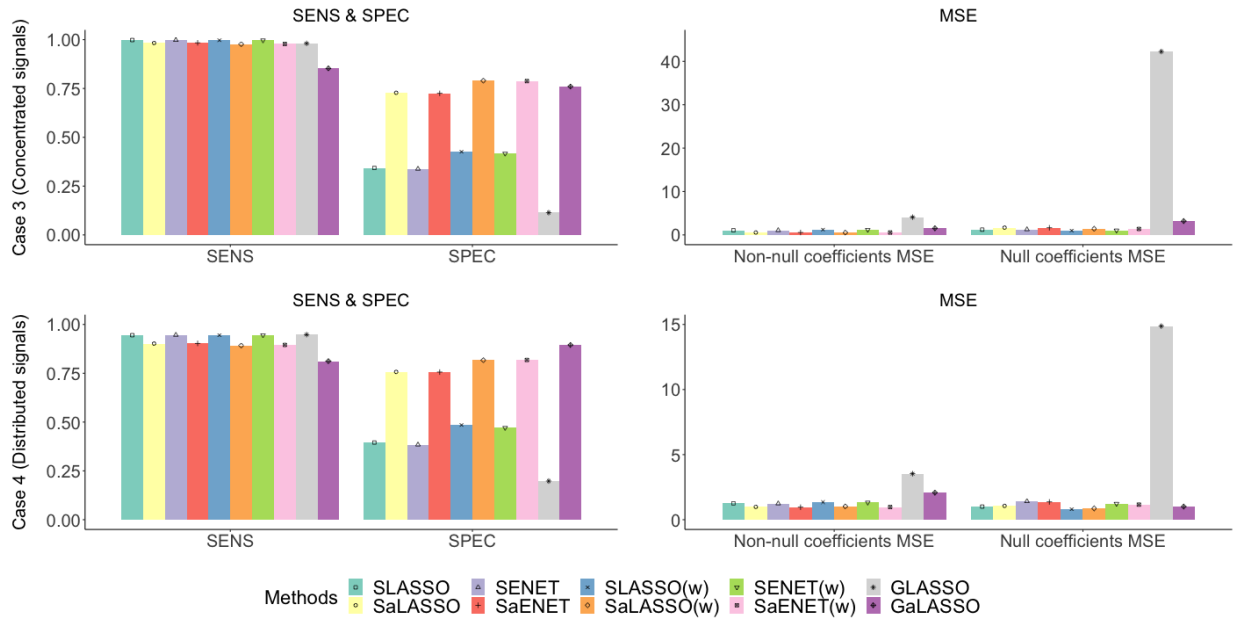

Figure S3: Simulation results for Case 3 (top panel) and Case 4 (bottom panel) where  $n=1000$  and  $p=100$  for 10 imputed datasets. Sensitivity (SENS) and specificity (SPEC) are on the left and MSE for non-null and null coefficients are on the right.

Table S6: Sensitivity (SENS), specificity (SPEC), MSE for non-null coefficients ( $MSE_{non-null}$ ), and MSE for null coefficients ( $MSE_{null}$ ) for simulation Cases 1-4 with 10 imputed datasets. Cases 1 and 2 have 500 observations with 20 covariates, while Cases 3 and 4 have 1000 observations with 100 covariates. Cases 1 and 3 correspond to concentrated signals and Cases 2 and 4 correspond to distributed signals.

|                  | SLASSO | SaLASSO | SENET | SaENET | SLASSO<br>(w) | SaLASSO<br>(w) | SENET<br>(w) | SaENET<br>(w) | GLASSO | GaLASSO |
|------------------|--------|---------|-------|--------|---------------|----------------|--------------|---------------|--------|---------|
| Case 1           |        |         |       |        |               |                |              |               |        |         |
| <i>SENS</i>      | 1.00   | 0.99    | 1.00  | 0.99   | 1.00          | 0.98           | 1.00         | 0.99          | 0.98   | 0.94    |
| <i>SPEC</i>      | 0.54   | 0.94    | 0.53  | 0.94   | 0.55          | 0.94           | 0.54         | 0.94          | 0.51   | 0.97    |
| $MSE_{non-null}$ | 1.54   | 0.84    | 1.53  | 0.85   | 1.61          | 0.84           | 1.60         | 0.85          | 2.29   | 1.43    |
| $MSE_{null}$     | 0.21   | 0.14    | 0.21  | 0.13   | 0.22          | 0.14           | 0.23         | 0.13          | 0.15   | 0.08    |
| Case 2           |        |         |       |        |               |                |              |               |        |         |
| <i>SENS</i>      | 0.98   | 0.91    | 0.98  | 0.91   | 0.98          | 0.90           | 0.98         | 0.90          | 0.95   | 0.81    |
| <i>SPEC</i>      | 0.56   | 0.95    | 0.56  | 0.94   | 0.58          | 0.95           | 0.57         | 0.95          | 0.58   | 0.98    |
| $MSE_{non-null}$ | 1.79   | 1.51    | 1.78  | 1.50   | 1.84          | 1.55           | 1.82         | 1.54          | 2.68   | 2.44    |
| $MSE_{null}$     | 0.19   | 0.14    | 0.19  | 0.14   | 0.20          | 0.14           | 0.20         | 0.14          | 0.13   | 0.09    |
| Case 3           |        |         |       |        |               |                |              |               |        |         |
| <i>SENS</i>      | 1.00   | 0.98    | 1.00  | 0.98   | 1.00          | 0.98           | 1.00         | 0.98          | 0.98   | 0.85    |
| <i>SPEC</i>      | 0.34   | 0.73    | 0.34  | 0.72   | 0.43          | 0.79           | 0.42         | 0.79          | 0.11   | 0.76    |
| $MSE_{non-null}$ | 1.07   | 0.55    | 1.05  | 0.56   | 1.22          | 0.54           | 1.20         | 0.55          | 4.09   | 1.54    |
| $MSE_{null}$     | 1.22   | 1.68    | 1.26  | 1.64   | 0.99          | 1.41           | 1.05         | 1.37          | 42.27  | 3.19    |
| Case 4           |        |         |       |        |               |                |              |               |        |         |
| <i>SENS</i>      | 0.94   | 0.90    | 0.95  | 0.90   | 0.94          | 0.89           | 0.94         | 0.90          | 0.95   | 0.81    |
| <i>SPEC</i>      | 0.40   | 0.76    | 0.38  | 0.76   | 0.48          | 0.82           | 0.47         | 0.82          | 0.20   | 0.90    |
| $MSE_{non-null}$ | 1.26   | 0.98    | 1.24  | 0.96   | 1.35          | 1.02           | 1.32         | 0.97          | 3.53   | 2.08    |
| $MSE_{null}$     | 1.00   | 1.42    | 1.06  | 1.36   | 0.80          | 1.23           | 0.87         | 1.16          | 14.87  | 1.01    |

Table S7: Sensitivity (SENS), specificity (SPEC), MSE for non-null coefficients ( $MSE_{non-null}$ ), and MSE for null coefficients ( $MSE_{null}$ ) for simulation Cases 1-4 with 10 imputed datasets. Cases 1 and 2 have 500 observations with 20 covariates, while Cases 3 and 4 have 1000 observations with 100 covariates. Cases 1 and 3 correspond to concentrated signals and Cases 2 and 4 correspond to distributed signals. For each measure, SLASSO is used as the benchmark and the ratio to SLASSO is presented.

|                  | SLASSO | SaLASSO | SENET | SaENET | SLASSO<br>(w) | SaLASSO<br>(w) | SENET<br>(w) | SaENET<br>(w) | GLASSO | GaLASSO |
|------------------|--------|---------|-------|--------|---------------|----------------|--------------|---------------|--------|---------|
| Case 1           |        |         |       |        |               |                |              |               |        |         |
| <i>SENS</i>      | 1.00   | 0.99    | 1.00  | 0.99   | 1.00          | 0.98           | 1.00         | 0.99          | 0.98   | 0.94    |
| <i>SPEC</i>      | 1.00   | 1.75    | 0.99  | 1.75   | 1.02          | 1.76           | 1.01         | 1.75          | 0.94   | 1.80    |
| $MSE_{non-null}$ | 1.00   | 0.55    | 0.99  | 0.55   | 1.04          | 0.55           | 1.03         | 0.55          | 1.49   | 0.93    |
| $MSE_{null}$     | 1.00   | 0.64    | 1.01  | 0.64   | 1.07          | 0.65           | 1.10         | 0.64          | 0.71   | 0.40    |
| Case 2           |        |         |       |        |               |                |              |               |        |         |
| <i>SENS</i>      | 1.00   | 0.92    | 1.00  | 0.92   | 1.00          | 0.91           | 1.00         | 0.92          | 0.97   | 0.82    |
| <i>SPEC</i>      | 1.00   | 1.67    | 0.99  | 1.67   | 1.02          | 1.68           | 1.01         | 1.68          | 1.03   | 1.73    |
| $MSE_{non-null}$ | 1.00   | 0.84    | 0.99  | 0.84   | 1.03          | 0.86           | 1.01         | 0.86          | 1.49   | 1.36    |
| $MSE_{null}$     | 1.00   | 0.75    | 1.02  | 0.73   | 1.05          | 0.71           | 1.07         | 0.72          | 0.66   | 0.48    |
| Case 3           |        |         |       |        |               |                |              |               |        |         |
| <i>SENS</i>      | 1.00   | 0.98    | 1.00  | 0.99   | 1.00          | 0.98           | 1.00         | 0.98          | 0.98   | 0.85    |
| <i>SPEC</i>      | 1.00   | 2.12    | 0.99  | 2.11   | 1.24          | 2.30           | 1.22         | 2.30          | 0.33   | 2.22    |
| $MSE_{nonnull}$  | 1.00   | 0.52    | 0.99  | 0.52   | 1.14          | 0.50           | 1.12         | 0.52          | 3.83   | 1.44    |
| $MSE_{null}$     | 1.00   | 1.38    | 1.03  | 1.34   | 0.81          | 1.16           | 0.86         | 1.12          | 34.62  | 2.61    |
| Case 4           |        |         |       |        |               |                |              |               |        |         |
| <i>SENS</i>      | 1.00   | 0.95    | 1.00  | 0.96   | 1.00          | 0.94           | 1.00         | 0.95          | 1.00   | 0.86    |
| <i>SPEC</i>      | 1.00   | 1.92    | 0.97  | 1.91   | 1.23          | 2.07           | 1.19         | 2.07          | 0.50   | 2.27    |
| $MSE_{nonnull}$  | 1.00   | 0.78    | 0.98  | 0.76   | 1.08          | 0.81           | 1.05         | 0.77          | 2.81   | 1.66    |
| $MSE_{null}$     | 1.00   | 1.41    | 1.05  | 1.36   | 0.80          | 1.22           | 0.86         | 1.15          | 14.80  | 1.00    |

## References

- Chen, Q. and S. Wang (2013). Variable selection for multiply-imputed data with application to dioxin exposure study. *Statistics in Medicine* 32(21), 3646–3659.
- Garcia, R. I., J. G. Ibrahim, and H. Zhu (2010). Variable selection in the cox regression model with covariates missing at random. *Biometrics* 66(1), 97–104.
- Johnson, B. A., D. Lin, and D. Zeng (2008). Penalized estimating functions and variable selection in semiparametric regression models. *Journal of the American Statistical Association* 103(482), 672–680.
- Long, Q. and B. A. Johnson (2015). Variable selection in the presence of missing data: resampling and imputation. *Biostatistics* 16(3), 596–610.
- Wan, Y., S. Datta, D. J. Conklin, and M. Kong (2015). Variable selection models based on multiple imputation with an application for predicting median effective dose and maximum effect. *Journal of Statistical Computation and Simulation* 85(9), 1902–1916.
- Wood, A. M., I. R. White, and P. Royston (2008). How should variable selection be performed with multiply imputed data? *Statistics in Medicine* 27(17), 3227–3246.
- Yang, X., T. R. Belin, and W. J. Boscardin (2005). Imputation and variable selection in linear regression models with missing covariates. *Biometrics* 61(2), 498–506.
